# Supplementary material
Source: MDPI journal article supplement (https://www.mdpi.com/2073-4344/13/1/102)
Supplement: s1 [file s1]

## SUPPORTING INFORMATION

# Usefulness of the Global *E* Factor as a Tool to Compare Different Catalytic Strategies: Four Case Studies

Achille Antenucci <sup>1,2,\*</sup> and Stefano Dughera <sup>1</sup>

<sup>1</sup> Department of Chemistry, University of Turin, Via P. Giuria 7, 10125 Turin, Italy

<sup>2</sup> Centro Ricerche per la Chimica Fine S.r.l. for Silvateam S.p.a., Via Torre, 7,  
12080 San Michele Mondovì (CN), Italy

\* Correspondence: achille.antenucci@unito.it

## ***E* factor diastereo- and enantioselective Diels Alder reaction by List**

1.83 g methyl cinnamate (8.0 mmol), of which 0.08 mmol waste, 0.013 g

6.6 mL cyclopentadiene (78.48 mmol,  $d = 0.786$  g/mL, 5.188 g), of which  $(78.48 - 7.92) = 70.56$  mmol waste, 4.664 g

0.2 mol% **5a** (1.6 mmol, 0.250 g, all waste)

0.0143 g catalyst (all waste)

### **COLUMN CHROMATOGRAPHY**

$m_{\text{SiO}_2} = 59.8 \times 1.826 = 109.195$  g (all waste)

Euent: Hexane/DCM 2.33:1 (average value of the gradient),  $d = 0.858$  g/mL

$m_{\text{eluent}} = 6.2 \times 0.858 \times 109.195 = 580.873$  g (all waste)

**Mass of useful product** = 1.83 g (99% yield)

**Total waste amount** = 695.009 g

***E* factor** = 380

## ***E<sub>G</sub>* factor diastereo- and enantioselective Diels Alder reaction by List**

1.83 g methyl cinnamate (8.0 mmol), of which 0.08 mmol waste, 0.013 g

6.6 mL cyclopentadiene (78.48 mmol, d= 0.786 g/mL, 5.188 g), of which (78.48-7.92)= 70.56 mmol waste, 4.664 g

0.2 mol% **5a** (1.6 mmol, 0.250 g, all waste)

0.0143 g catalyst (*E* factor= 4841, all waste)

69.226 g waste produced for the synthesis of 0.0143 mg of catalyst (all waste)

### **COLUMN CHROMATOGRAPHY**

$m_{\text{SiO}_2} = 59.8 \times 1.826 = 109.195 \text{ g}$  (all waste)

Euent: Hexane/DCM 2.33:1 (average value of the gradient), d= 0.858 g/mL

$m_{\text{eluent}} = 6.2 \times 0.858 \times 109.195 = 580.873 \text{ g}$  (all waste)

**Mass of useful product** = 1.83 g (99% yield)

**Total waste amount** = 764.235 g (10% additional waste)

***E<sub>G</sub>* factor** = 418

## ***E* factor copper-bipyridine complex by Feringa**

### **STEP 1**

0.93 g 4-methylpyridine (1 mmol, of which 0.0328 g waste)

20 mL AcOH (d= 1.05 g/mL), 21 g (all waste)

15 mL 30% H<sub>2</sub>O<sub>2</sub> (d= 1.11 g/mL), 16.65 g (all waste)

0.0118 g Pd/C (all waste)

165 g PCl<sub>3</sub> (all waste)

20 mL EtOAc (d= 0.902 g/mL), 18.04 g (all waste)

**Non-Normalized Waste Amount (NNWA) = 220.7346 g**

**Normalization factor (NF) = 0.042354**

**Normalized Waste Amount (NWA) = 9.349 g**

**Mass of useful product = 0.8972 g (97.4% yield)**

### **STEP 2**

0.038 g bipyridine (0.24 mmol), of which 0.10 mmol, 0.018 g waste

0.100 g Cu(NO<sub>3</sub>)<sub>2</sub>·3H<sub>2</sub>O (0.41 mmol), of which 0.065 g (0.27 mmol) waste

10 mL flat-rate EtOH (d= 0.789 g/mL), 7.89 g (all waste)

**NNWA = NWA = 7.973 g**

**Mass of useful product = 0.049 g (0.14 mmol, 59% yield)**

**Total waste amount = 9.349 + 7.973 = 17.322 g**

***E* factor = 354**

## ***E* factor diastereo- and enantioselective Diels Alder reaction by Feringa**

### **STEP 1**

0.212 g 2-(1-methylimidazolyl)cinnamate (1 mmol, of which 0.3 mmol, 0.064 g waste)

0.019 g copper complex, 0.05 mmol (all waste)

166 g H<sub>2</sub>O (all waste)

333 mL st-DNA aqueous solution (d= 1.0 g/mL, approx), 333 g (all waste)

2 mL DMSO (d= 1.1 g/mL), 2.2 g (all waste)

0.67 mL cyclopentadiene (8.0 mmol, d= 0.786 g/mL, 0.527 g), of which 7.3 mmol, 0.483 g waste

500 mL EtOAc (flat-rate for extractions, d= 0.902 g/mL), 451 g (all waste)

53.2 g Na<sub>2</sub>SO<sub>4</sub> (20 flat-rate 1 cm<sup>3</sup>-spoons, d= 2.66 g/cm<sup>3</sup>)

### **COLUMN CHROMATOGRAPHY**

$m_{\text{SiO}_2} = 59.8 \times 0.278 = 16.624 \text{ g}$  (all waste)

Eluent: Pentane/EtOAc 25:1 (d= 0.637 g/mL)

$m_{\text{eluent}} = 6.2 \times 16.624 \times 0.637 = 65.655 \text{ g}$  (all waste)

**NNWA = 1088.245 g**

**NF = 0.12857**

**NWA = NNWA x NF = 1088.245 x 0.12857 = 139.916 g**

**Mass of useful product = 0.194 g (0.7 mmol, 70% yield)**

### **STEP 2**

0.024 g, 0.09 mmol (of which 59%, 0.0531 mmol, 0.015 g waste)

0.010 g molecular sieves (all waste)

0.6 mL CH<sub>3</sub>CN (d= 0.786 g/mL), 0.472 g (all waste)

0.15 mL DBU (d= 1.02 g/mL), 0.153 g (all waste)

30 mL EtOAc (d= 0.902 g/mL), 27.06 g (all waste)

30 mL sat.  $\text{NaHCO}_3$  ( $d = 1.1 \text{ g/mL}$ ), 33 g (all waste)

15 mL brine ( $d = 1.15 \text{ g/mL}$ ), 17.25 g (all waste)

2.66 g  $\text{Na}_2\text{SO}_4$  (1 flat-rate 1  $\text{cm}^3$ -spoon,  $d = 2.66 \text{ g/cm}^3$ ) (all waste)

### **COLUMN CHROMATOGRAPHY**

$m_{\text{SiO}_2} = 59.8 \times 0.0205 = 1.226 \text{ g}$  (all waste)

Eluent: Pentane/EtOAc 25:1 ( $d = 0.637 \text{ g/mL}$ )

$m_{\text{eluent}} = 6.2 \times 1.226 \times 0.637 = 4.842 \text{ g}$  (all waste)

**NWA = NNWA = 86.688 g**

**Mass of useful product = 0.008 g (0.037 mmol, 41% yield)**

**Total waste amount = 89.688 + 139.916 = 229.604 g**

**E factor = 28700**

## ***E<sub>G</sub>* factor diastereo- and enantioselective Diels Alder reaction by Feringa**

### **STEP 1**

0.212 g 2-(1-methylimidazolyl)cinnamate (1 mmol, of which 0.3 mmol, 0.064 g waste)

0.019 g copper complex (E factor= 354, 0.05 mmol, all waste)

6.726 g waste produced for the synthesis of 0.019 g of copper complex (all waste)

166 g H<sub>2</sub>O (all waste)

333 mL st-DNA aqueous solution (d= 1.0 g/mL, approx), 333 g (all waste)

2 mL DMSO (d= 1.1 g/mL), 2.2 g (all waste)

0.67 mL cyclopentadiene (8.0 mmol, d= 0.786 g/mL, 0.527 g), of which 7.3 mmol, 0.483 g waste

500 mL EtOAc (flat-rate for extractions, d= 0.902 g/mL), 451 g (all waste)

53.2 g Na<sub>2</sub>SO<sub>4</sub> (20 flat-rate 1 cm<sup>3</sup>-spoons, d= 2.66 g/cm<sup>3</sup>)

### **COLUMN CHROMATOGRAPHY**

$m_{\text{SiO}_2} = 59.8 \times 0.278 = 16.624 \text{ g}$  (all waste)

Eluent: Pentane/EtOAc 25:1 (d= 0.637 g/mL)

$m_{\text{eluent}} = 6.2 \times 16.624 \times 0.637 = 65.655 \text{ g}$  (all waste)

**NNWA** = 1094.971 g

**NF** = 0.12857

**NWA** = **NNWA** × **NF** = 1094.971 × 0.12857 = 140.780 g

**Mass of useful product** = 0.194 g (0.7 mmol, 70% yield)

### **STEP 2**

0.024 g, 0.09 mmol (of which 59%, 0.0531 mmol, 0.015 g waste)

0.010 g molecular sieves (all waste)

0.6 mL CH<sub>3</sub>CN (d= 0.786 g/mL), 0.472 g (all waste)

0.15 mL DBU (d= 1.02 g/mL), 0.153 g (all waste)

30 mL EtOAc (d= 0.902 g/mL), 27.06 g (all waste)

30 mL sat. NaHCO<sub>3</sub> (d= 1.1 g/mL), 33 g (all waste)

15 mL brine (d= 1.15 g/mL), 17.25 g (all waste)

2.66 g Na<sub>2</sub>SO<sub>4</sub> (1 flat-rate 1 cm<sup>3</sup>-spoon, d= 2.66 g/cm<sup>3</sup>) (all waste)

### **COLUMN CHROMATOGRAPHY**

$m_{\text{SiO}_2} = 59.8 \times 0.0205 = 1.226 \text{ g}$  (all waste)

Eluent: Pentane:EtOAc 25:1 (d= 0.637 g/mL)

$m_{\text{eluent}} = 6.2 \times 1.226 \times 0.637 = 4.842 \text{ g}$  (all waste)

**NWA = NNWA = 86.688 g**

**Mass of useful product = 0.008 g (0.037 mmol, 41% yield)**

**Total waste amount = 89.688 + 140.780 = 230.468 g**

**E<sub>G</sub> factor = 28808.5 (0.38% additional waste)**



## **$E_G$ factor regioselective internal arylalkyne hydration by Bassetti**

1.0 mmol 1-phenylpropyne (MW=116.16, of which 0.22 mmol, 0.025 g waste)

0.1 mmol Fe catalyst (MW= 561.97, 0.056 g, all waste)

2 mL AcOH (d= 1.05 g/mL), 2.10 g, all waste except for 0.78 mmol H<sub>2</sub>O, 0.014 g,  
total waste amount 2.086 g)

20 mL Et<sub>2</sub>O (d= 0.713 g/mL), 14.26 g (all waste)

20 mL sat. NaHCO<sub>3</sub> (d= 1.1 g/mL), 22 g (all waste)

2.66 g Na<sub>2</sub>SO<sub>4</sub> (1 flat-rate 1 cm<sup>3</sup> spoon, all waste)

### **COLUMN CHROMATOGRAPHY**

$m_{\text{SiO}_2} = 59.8 \times 0.134 = 8.013 \text{ g}$  (all waste)

Euent: petroleum ether (d= 0.640 g/mL)

$m_{\text{eluent}} = 6.2 \times 0.640 \times 8.013 = 31.796 \text{ g}$  (all waste)

**Mass of useful product** = 0.105 g (MW= 134.18, 78% yield)

**Total waste amount** = 80.896 g

**$E$  factor** =  **$E_G$  factor** = 770

## **E factor Wang and Li catalyst**

1 g P123

3 g KCl

31 g diluted HCl (all waste)

1.8 mL BTEE (bis-(triethoxysilyl)ethane,  $d = 0.958$  g/mL), 1.724 g

0.13 mL MPTMS (trimethoxysilane,  $d = 0.96$  g/mL), 0.125 g

100 g H<sub>2</sub>O (all waste)

500 mL EtOH ( $d = 0.789$  g/mL), 394.5 g (all waste)

7 mL 0.017 M (5.776 g/L) HAuCl<sub>4</sub>, 0.040 g HAuCl<sub>4</sub> in 7 mL EtOH ( $d = 0.789$  g/mL), 5.523 g

50 g H<sub>2</sub>O (all waste)

50 mL EtOH ( $d = 0.789$  g/mL), 39.45 g (all waste)

**Mass of useful product** = 1.0 g (0.10 mmol Au/g, 19.7 mg Au/g)

**Total waste amount** = 625.322 g (waste calculated by difference)

**E factor** = 625

## ***E* factor regioselective internal arylalkyne hydration by Wang and Li**

0.25 mmol 1-phenylpropyne (MW=116.16, of which 0.0025 mmol, 1.5 mg waste)

0.1 g (0.1 mmol, 1.0 mmol Au/g) Au catalyst (recovered, no waste)

4 g H<sub>2</sub>O (of which 3.9991 g waste)

6 mL (3 x 2 mL) EtOAc (d= 0.902 g/mL), 5.412 g (all waste)

**Mass of useful product** = 31.9 mg

**Total waste amount** = 9412.6 mg

***E* factor** = 295

## ***E<sub>G</sub>* factor regioselective internal arylalkyne hydration by Wang and Li**

0.25 mmol 1-phenylpropyne (MW=116.16, of which 0.0025 mmol, 1.5 mg waste)

0.1 g (0.1 mmol, 1.0 mmol Au/g) Au catalyst (recovered, no waste)

62.5 g due to the synthesis of 0.1 g Au catalyst (*E* factor = 625, all waste)

4 g H<sub>2</sub>O (of which 3.9991 g waste)

6 mL (3 x 2 mL) EtOAc (d= 0.902 g/mL), 5.412 g (all waste)

**Mass of useful product** = 31.9 mg

**Total waste amount** = 71912.6 mg

***E* factor** = 2254

## **E factor Rhodium chiral Pincer complex by Arai**

### **STEP 1**

1.111 g 5-(*t*-butyl)isophthalic acid (5.0 mmol, of which 5.0 mmol, 0.032 g O<sub>2</sub> waste)

45 mL THF (d= 0.888 g/mL), 39.96 g (all waste)

1,518 g LiAlH<sub>4</sub> (40 mmol, all waste)

45 mL (flat-rate amount for quenching) sat. aqueous potassium sodium tartrate (d= 1.1 g/mL), 49.5 g (all waste)

135 mL EtOAc (flat-rate amount for extractions, d= 0.902 g/mL), 121.77 g (all waste)

14.364 g Na<sub>2</sub>SO<sub>4</sub> (5,4 flat-rate 1 cm<sup>3</sup>-spoons, all waste)

17.4 g MnO<sub>2</sub> (200 mmol, all waste except for 5.0 mmol of O<sub>2</sub>, 0.160 g; resulting waste mass of 17.24 g)

15 mL DCM (d= 1.33 g/mL), 19.95 g (all waste)

### **FILTRATION ON CELITE (d= 0.47 g/mL)**

m<sub>celite</sub> = 62.83 g (4 cm-diameter and 5 cm high cylindrical column, all waste)

50 mL DCM (flat-rate amount for washing, d= 1.33 g/mL), 66.5 g (all waste)

**Non-Normalized Waste Amount (NNWA) = 393.664 g**

**Normalization factor (NF) = 0.2**

**Normalized Waste Amount (NWA) = 393.664 × 0.2 × 1.1828 × 1.1086 = 103.239 g**

**Mass of useful product = 5.0 mmol (100% yield)**

### **STEP 2**

0.1902 mg 5-(*t*-butyl)isophthalaldehyde S2.1 (MW= 190.24, 1.0 mmol, of which 7%, 0.07 mmol, 0.013 g waste)

25 mL DCM (d= 1.33 g/mL), 33.25 g (all waste)

126 µL AcOH (d= 1.05 g/mL), 0.132 g (all waste)

0.6653 g (1*R*,2*R*)-*N*-benzyl-1,2-diphenylethane-1,2-diamine (MW= 312.41, 2.2 mmol, of which 0.214 mmol, 0.067 g waste)

25 g H<sub>2</sub>O (flat-rate amount for quenching, all waste)

75 mL DCM (flat-rate amount for extraction  $d = 1.33$  g/mL), 99.75 g (all waste)

7.98 g Na<sub>2</sub>SO<sub>4</sub> (3 flat-rate 1 cm<sup>3</sup>-spoons, all waste)

### COLUMN CHROMATOGRAPHY

$$m_{\text{SiO}_2} = 59.8 \times 0.759 = 45.388 \text{ g}$$

Euent: Hex/EtOAc 5:1 ( $d = 0.696$  g/mL)

$$m_{\text{eluent}} = 6.2 \times 0.696 \times 45.388 = 195.858 \text{ g waste}$$

$$\text{NNWA} = 407.438 \text{ g}$$

$$\text{NF} = 1.1828$$

$$\text{NWA} = 407.438 \times 1.1828 \times 1.1086 = 534.254 \text{ g}$$

**Mass of useful product** = 0.93 mmol **S2.2** (93% yield)

### STEP 3

1.1 mmol **S2.2** (MW= 759.05, 0.835 g, all waste except for 0.451 mmol, 0.203 g, total waste amount 0.632 g)

20 mL MeOH ( $d = 0.792$  g/mL), 15.84 g (all waste)

0.084 NaHCO<sub>3</sub> (all waste)

1.0 mmol RhCl<sub>3</sub> trihydrate (0.2633 g, all waste, except for 0.451 mmol "RhCl<sub>2</sub>", 0.0783 g, total waste amount 0.185 g)

10 mL MeOH ( $d = 0.792$  g/mL), 7.92 g (all waste)

10 mL CH<sub>3</sub>CN (MW= 41.05  $d = 0.786$  g/mL), 7.86 g (all waste, except for 0.451 mmol, 0.019 g, total waste amount 7.841 g)

$$\text{NNWA} = 32.502 \text{ g}$$

$$\text{NF} = 1.1086$$

$$\text{NWA} = 32.502 \times 1.1086 = 36.032 \text{ g}$$

$$\text{Mass of useful product} = 0.451 \text{ mmol (41\% yield)}$$

#### **STEP 4**

0.5 mmol Rh-chloride Pincer complex (no waste, 100% yield assumed)

0.334 g AgOAc (all waste, except for 1.0 mmol AcO<sup>-</sup>, 0.059 g, total waste amount 0.275 g)

15 mL DCM (d= 1.33 g/mL), 19.95 g (all waste)

#### **COLUMN CHROMATOGRAPHY**

$$m_{\text{SiO}_2} = 59.8 \times 0.510 = 30.498 \text{ g (all waste)}$$

Euent: EtOAc/MeOH 1:1 (d= 0.847 g/mL)

$$m_{\text{eluent}} = 6.2 \times 0.847 \times 30.498 = 160.157 \text{ g (all waste)}$$

$$\text{NNWA} = \text{NWA} = 210.88 \text{ g}$$

$$\text{Mass of useful product} = 0.5 \text{ mmol, } 0.510 \text{ g}$$

$$\text{Total waste amount} = 103.239 + 534.254 + 36.032 + 210.88 = 884.405 \text{ g}$$

$$E \text{ factor} = 1734$$

## ***E* factor Rh-catalyzed enantioselective Mannich reaction by Arai**

6.3 mg Rh catalyst (all waste)

19.8 mg malononitrile (MW= 66.06, 0.3 mmol, of which 0.1 mmol waste, 6.6 mg)

0.2 mmol benzaldehyde N-Boc aldimine (MW= 205.26, 41.1 mg, no waste)

4 mL toluene (d= 0.867 g/mL), 3468 mg (all waste)

### **COLUMN CHROMATOGRAPHY**

$m_{\text{SiO}_2} = 59.8 \times 54.264 = 3245 \text{ mg}$  (all waste)

Euent: Hex/EtOAc 4:1 (d= 0.704 g/mL)

$m_{\text{eluent}} = 6.2 \times 0.704 \times 3245 = 14163.8 \text{ mg}$  (all waste)

**Mass of useful product** = 53.7 mg (MW= 271.32, 99% yield)

**Total waste amount** = 20889.7 mg

***E* factor** = 389

## ***E<sub>G</sub>* factor Rh-catalyzed enantioselective Mannich reaction by Arai**

6.3 mg Rh catalyst (E factor = 1734, all waste)

10924.2 mg waste to produce the necessary amount of catalyst

19.8 mg malononitrile (MW= 66.06, 0.3 mmol, of which 0.1 mmol waste, 6.6 mg)

0.2 mmol benzaldehyde N-Boc aldimine (MW= 205.26, 41.1 mg, no waste)

4 mL toluene (d= 0.867 g/mL), 3468 mg (all waste)

### **COLUMN CHROMATOGRAPHY**

$m_{\text{SiO}_2} = 59.8 \times 54.264 = 3245 \text{ mg}$

Euent: Hex/EtOAc 4:1 (d= 0.704 g/mL)

$m_{\text{eluent}} = 6.2 \times 0.704 \times 3245 = 14163.8 \text{ mg}$

**Mass of useful product** = 53.7 mg (MW= 271.32, 99% yield)

**Total waste amount** = 31813.9 mg (52.3% additional waste)

**E factor** = 592



## ***E* factor Cinchona alkaloid-based chiral halogen bond donor organocatalyst by Arai**

0.5 mmol iodoperfluorobenzoic acid (MW= 319.9, of which 25%, 0.125 mmol, 0.040 g waste)

0.5 mmol aminoquinidine (*E* factor= 150, MW= 323.44, 0.162 g, of which 25%, 0.125 mmol, 0.040 g waste)

24.3 g waste produced to synthesize 0.5 mmol aminoquinidine (all waste)

0.5 mmol EDCI·HCl (MW= 191.70, of which 25%, 0.125 mmol, 0.024 g waste)

0.015 mmol HOBt (MW= 135.12, 0.002 g, all waste)

10 mL DCM (d= 1.33 g/mL), 13.3 g (all waste)

0.375 mmol H<sub>2</sub>O produced (MW = 18.01, 0.007 g, all waste)

1.064 g Na<sub>2</sub>SO<sub>4</sub> (d= 2.66 g/mL, flat-rate, all waste)

### **COLUMN CHROMATOGRAPHY**

$$m_{\text{SiO}_2} = 59.8 \times 0.313 = 18.717 \text{ g}$$

Euent: Hex/EtOAc/Et<sub>3</sub>N 1:1:0.3 (d= 0.772 g/mL)

$$m_{\text{eluent}} = 6.2 \times 0.772 \times 18.717 = 89.587 \text{ g}$$

**Mass of useful product** = 0.235 g (MW= 625.41, 0.375 mmol, 75% yield)

**Total waste amount** = 147.081 g

**E factor** = 626

## ***E* factor organocatalyzed enantioselective Mannich reaction by Arai**

0.6 mg organocatalyst (all waste)

26.4 mg malononitrile (MW= 66.06, 0.4 mmol, of which 0.214 mmol waste, 14.1 mg)

0.2 mmol benzaldehyde N-Boc aldimine (MW= 205.26, 41.1 mg, of which 7%, 0.014 mmol, 2.9 mg waste)

2 mL CHCl<sub>3</sub> (d= 1.49 g/mL), 2980 mg (all waste)

### **COLUMN CHROMATOGRAPHY**

$m_{\text{SiO}_2} = 59.8 \times 54.264 = 3245 \text{ mg}$

Euent: Hex/EtOAc 4:1 (d= 0.704 g/mL)

$m_{\text{eluent}} = 6.2 \times 0.704 \times 3245 = 14163.8 \text{ mg}$

**Mass of useful product** = 50.5 mg (0.186 mmol, 93% yield)

**Total waste amount** = 20406.4 mg

***E* factor** = 404

## ***E<sub>G</sub>* factor organocatalyzed enantioselective Mannich reaction by Arai**

0.6 mg organocatalyst (E factor= 626, all waste)

375.6 mg waste produced to synthesize 0.6 mg of organocatalyst (all waste)

26.4 mg malononitrile (MW= 66.06, 0.4 mmol, of which 0.214 mmol waste, 14.1 mg)

0.2 mmol benzaldehyde N-Boc aldimine (MW= 205.26, 41.1 mg, of which 7%, 0.014 mmol, 2.9 mg waste)

2 mL CHCl<sub>3</sub> (d= 1.49 g/mL), 2980 mg (all waste)

### **COLUMN CHROMATOGRAPHY**

$m_{\text{SiO}_2} = 59.8 \times 54.264 = 3245 \text{ mg}$

Euent: Hex/EtOAc 4:1 (d= 0.704 g/mL)

$m_{\text{eluent}} = 6.2 \times 0.704 \times 3245 = 14163.8 \text{ mg}$

**Mass of useful product** = 50.5 mg (0.186 mmol, 93% yield)

**Total waste amount** = 20782 mg (1.8% additional waste)

***E<sub>G</sub>* factor** = 412
